# Supplementary material for: Application of the SMALP technology to the isolation of GPCRs from low-yielding cell lines
Source: bioRxiv or medRxiv preprint supplement (doi:10.1101/2021.01.26.428305), 2021-01-27
Supplement: Supplementary file [file media-1.pdf]

## SUPPLEMENTARY MATERIAL

### Application of the SMALP technology to the isolation of GPCRs from low-yielding cell lines

Daniele Tedesco, Maciej Maj, Paulina Malarczyk, Andrea Cingolani, Mirko Zaffagnini, Artur Wnorowski, Tiziana Benelli, Rita Mazzoni, Manuela Bartolini, Krzysztof Józwiak

#### S1 Synthesis and characterization of SMAc co-polymer C30

The synthesis of N30 by co-polymerization of Sty with MAn (Sty/MAn ratio 8:1 n/n) was carried out in THF solution under radical conditions in the presence of AIBN (4%, n/n) as thermal initiator, achieving a yield of 35%. The occurrence of polymerization involving the double bonds was confirmed by <sup>1</sup>H-NMR analysis, which showed the lack of the resonances of vinylic protons of MAn and Sty (around 7.1, 5.7 and 5.2 ppm respectively). Furthermore, a new signal appeared in the 1–2 ppm region belonging to the aliphatic main chain. The final molar composition of N30 was assessed by <sup>13</sup>C-NMR by comparing the integrated peak areas of MAn carbonyl carbon atoms, located at around 173 ppm, to those related to the aromatic carbon atoms of Sty co-units in the range 150–120 ppm (Figure S1). The pre-hydrolyzed copolymer showed a MAn content of 30% (Sty/MAn ratio: 2.3:1, n/n).

N30 was then hydrolyzed to C30 in alkaline solution [1]; the reaction was boosted by subsequent additions of NaOH and by increasing the reaction time (5 days). The ATR-FTIR analysis of the obtained white solid (Figure S2) confirmed the presence of the SMAc co-polymer: the absence of the signals at 1855 and 1775 cm<sup>-1</sup> related to the C=O stretching of MAn (Figure S3), and the presence of the signal at 1565 cm<sup>-1</sup> related to the COO<sup>-</sup> stretching of maleic acid (MAc) reasonably led us to assume that the hydrolytic cleavage was taken to completion. On the other hand, the <sup>13</sup>C-NMR spectrum showed a downfield shift of the resonances of the carbonyl carbon atoms. The integration of the <sup>13</sup>C-NMR spectrum confirmed that the Sty/MAc ratio was maintained after hydrolysis. The average molecular weights of C30 were assessed by SEC analysis in THF solution at 25 °C ( $\bar{M}_n = 6000$  g/mol;  $\bar{M}_w = 11500$  g/mol).

#### References

- [1] S.C. Lee, T.J. Knowles, V.L.G. Postis, M. Jamshad, R.A. Parslow, Y. Lin, A. Goldman, P. Sridhar, M. Overduin, S.P. Muench, T.R. Dafforn, A method for detergent-free isolation of membrane proteins in their local lipid environment, *Nat. Protoc.* 11 (2016) 1149–1162. <https://doi.org/10.1038/nprot.2016.070>.

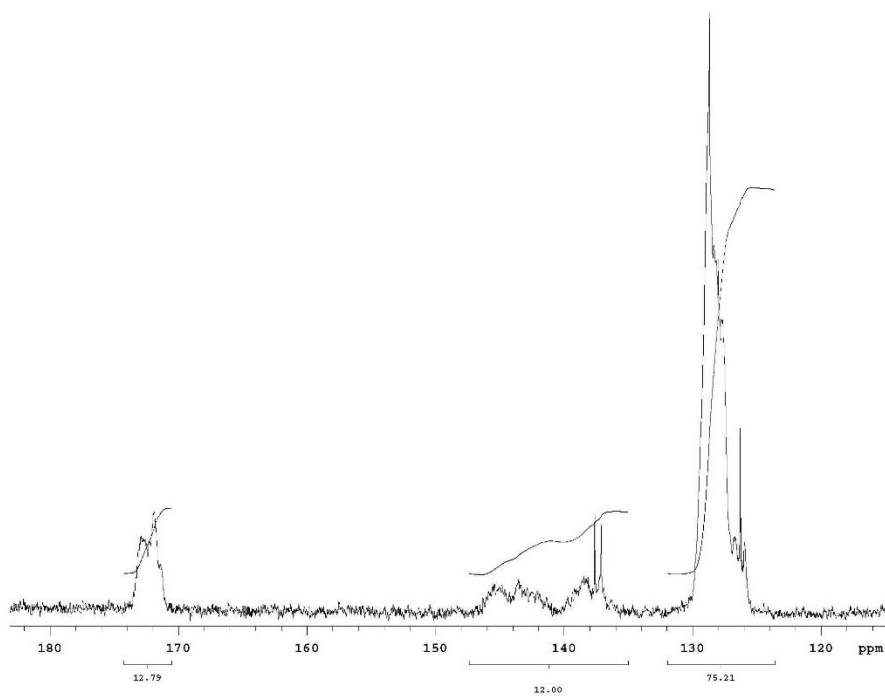

**Figure S1.**  $^{13}\text{C}$ -NMR spectrum of SMAn co-polymer N30 [solvent:  $\text{Cr}(\text{acac})_3$  0.1 M in acetone- $d_6$ ].

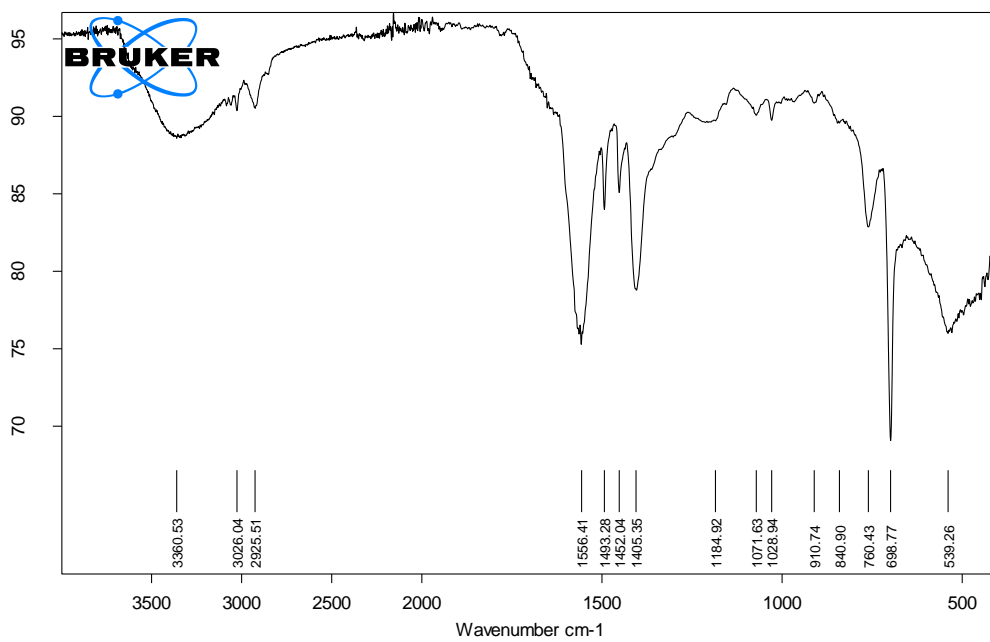

**Figure S2.** ATR-FTIR spectrum of SMac co-polymer C30.

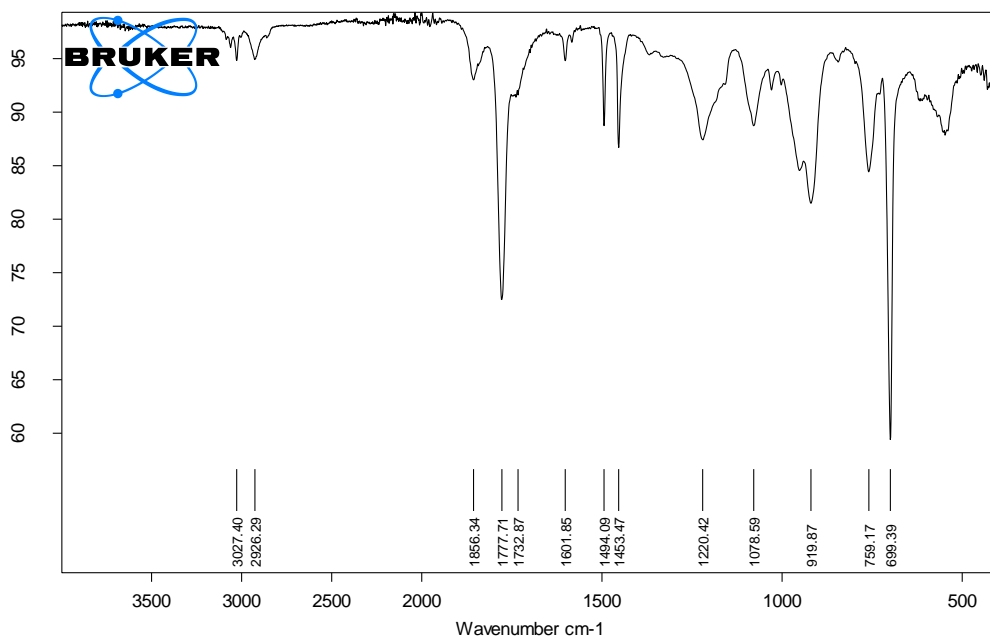

**Figure S3.** ATR-FTIR spectrum of SMAn co-polymer N30.

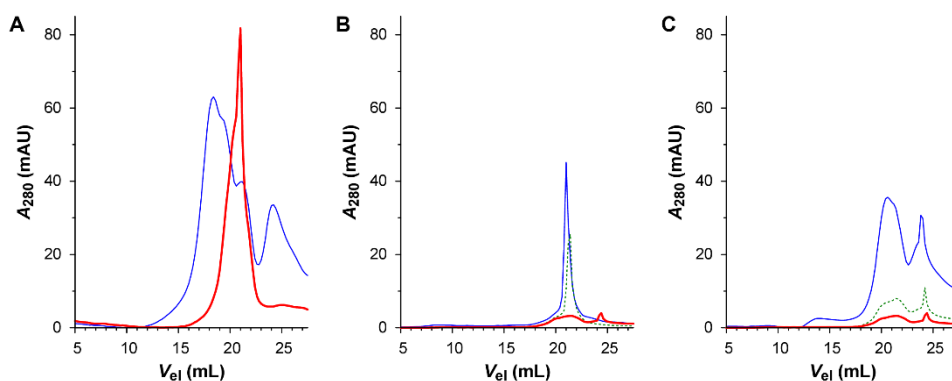

**Figure S4.** Chromatograms (280 nm) of SMAn co-polymer X30 in KP10 buffer (pH 8.0) mixed 1:1 (v/v) with SMALP buffers, as obtained by SEC analysis on a Superdex 200 10/300 GL column. **(A)** Samples were prepared with X30 4% (m/v) and SB500 buffer; SEC runs were performed using RB500 (*thin*) and RB0 (*bold*) buffers as mobile phases. **(B)** Samples were prepared with X30 0.8% (m/v) and SB500 (*thin*), SB250 (*dotted*) or SB0 (*bold*) buffers; SEC runs were performed using RB0 buffer as mobile phase. **(C)** Samples were prepared with X30 8% (m/v; *thin*), 2% (m/v; *dotted*) or 0.8% (m/v; *bold*) and membranes suspended in SB0 buffer; SEC runs were performed using RB0 buffer as mobile phase.
